# Supplementary material for: Transcriptome Analysis of Macrophytes’ Myriophyllum spicatum Response to Ammonium Nitrogen Stress Using the Whole Plant Individual
Source: MDPI journal article supplement (doi:10.3390/plants12223875), 2023-11-16

## Supplementary

**Figure S1.** A comparison summary of regulations of the top 10 genes in above and below-ground parts of the macrophyte. The letters represent the genes; Serine/threonine-protein kinase STY46(STY46), Aspartate aminotransferase (AATC), L-asparaginase (ASPGB), Alpha Carbonic anhydrase ( $\alpha$  CA), Ammonium transporter 1 member 2 (AMT12), Asparagine synthetase (ASNS), Glutamate synthase 1 [NADH] (GLT1), Ferredoxin-dependent glutamate synthase 1 (GLU1), NADP-specific glutamate dehydrogenase (DHE4), and Glutamine synthetase cytosolic isozyme 1 (GLNA1). It was plotted using the data of the highest ammonium concentrations only (50 mg/L for leaf and stem; 1250 mg/L for Root). The red and blue represent upregulated and downregulated genes respectively.

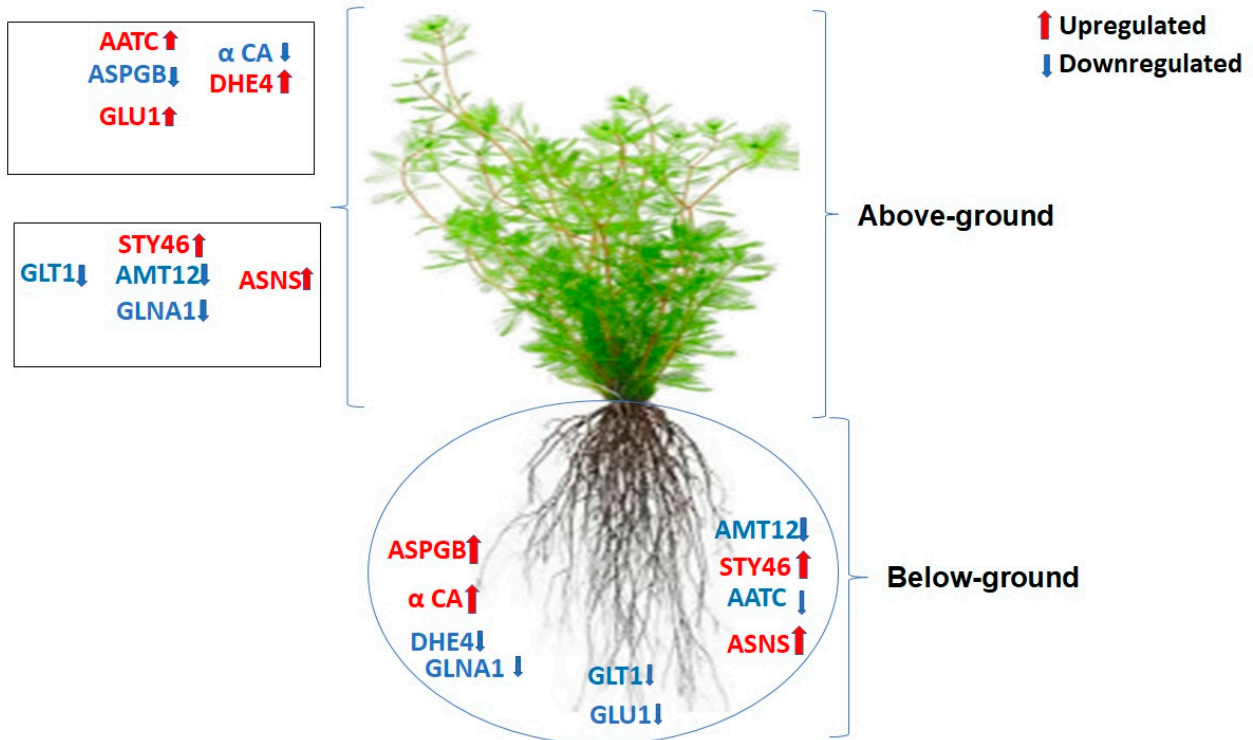

Supplement: s1 [file s1]
